# Supplementary material for: Use of Antibiotic Treatment in Pregnancy and the Risk of Several Neonatal Outcomes: A Population-Based Study
Source: MDPI journal article supplement (doi:10.3390/ijerph182312621), 2021-11-30
Supplement: s1 [file s1]

## Supplementary material

This appendix has been provided by the authors to give readers additional information about their work.

**Table S1 Specific diagnostic and therapeutic codes used for the current study**

- ICD-9 Diagnostic codes for delivery

| <b>ICD-9 codes</b>     |                                                                   |
|------------------------|-------------------------------------------------------------------|
| ICD-9 Diagnostic codes | v27.xx or 640.xy – 676.xy (where y=1 or 2)                        |
| ICD-9 Procedures codes | 72.x, 73.2, 73.5, 73.6, 73.8, 73.9, 74.0, 74.1, 74.2, 74.4, 74.99 |

- ICD-9 Diagnostic codes for premature rupture of membranes and placenta abruption

| <b>ICD-9 codes</b>             |                       |
|--------------------------------|-----------------------|
| Premature rupture of membranes | 658.1x, 658.2x, 761.1 |
| Placenta abruption             | 641.2x, 762.1         |

- ICD-9 Diagnostic codes for congenital malformation

| <b>ICD-9 codes</b>      |           |
|-------------------------|-----------|
| Congenital malformation | 740 - 759 |

- ICD-9 Diagnostic codes for miscarriage and/or stillbirth

| <b>ICD-9 codes</b> |                            |
|--------------------|----------------------------|
| Miscarriage        | 634-639                    |
| Stillbirth         | 656.4, V27.1, V27.4, V27.7 |

- ATC codes for the prescription of antibiotics

| <b>ATC CODE</b> | <b>Antibiotic classes</b>                   |
|-----------------|---------------------------------------------|
| J01A            | Tetracyclines                               |
| J01B            | Amphenicols                                 |
| J01C            | Beta-lactam antibacterials, penicillins     |
| J01D            | Other beta-lactam antibacterials            |
| J01E            | Sulfonamides and trimethoprim               |
| J01F            | Macrolides, lincosamides and streptogramins |
| J01G            | Aminoglycoside antibacterials               |
| J01M            | Quinolone antibacterials                    |
| J01R            | Combinations of antibacterials              |
| J01X            | Other antibacterials                        |

Figure S1 Exposure definition

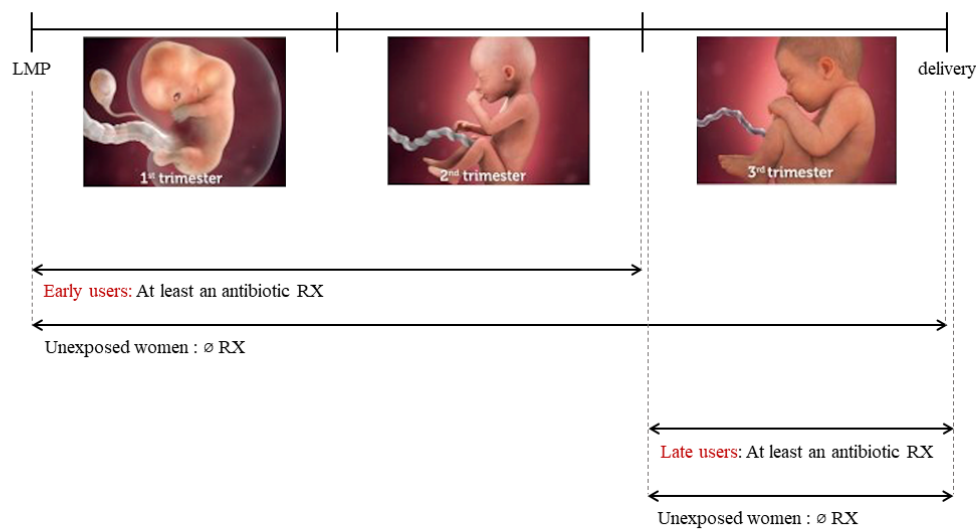

**Table S2. Distribution of neonatal outcomes**

| <b>PTB</b> | <b>LBW</b> | <b>SGA</b> | <b>Low Apgar</b> | <b>No. Of women</b> | <b>(%)</b> |
|------------|------------|------------|------------------|---------------------|------------|
|            |            |            |                  | 685,981             | (88.72)    |
|            |            |            |                  | 2365                | (0.31)     |
|            |            |            |                  | 35,340              | (4.57)     |
|            |            |            |                  | 183                 | (0.02)     |
|            |            |            |                  | 1398                | (0.18)     |
|            |            |            |                  | 4                   | (0.00)     |
|            |            |            |                  | 16,771              | (2.17)     |
|            |            |            |                  | 134                 | (0.02)     |
|            |            |            |                  | 15,268              | (1.97)     |
|            |            |            |                  | 147                 | (0.02)     |
|            |            |            |                  | 11,406              | (1.48)     |
|            |            |            |                  | 500                 | (0.06)     |
|            |            |            |                  | 3601                | (0.47)     |
|            |            |            |                  | 139                 | (0.02)     |

**Table S3. Distribution of the Early and Late exposure**

| Early exposure | Late exposure | No. Of women | (%)     |
|----------------|---------------|--------------|---------|
|                |               | 564,292      | (72.98) |
|                |               | 49,959       | (6.46)  |
|                |               | 132,024      | (17.07) |
|                |               | 26,962       | (3.49)  |
